# **A spatially resolved stochastic model reveals the role of supercoiling in transcription regulation**

Yuncong Geng<sup>1, #a, \*</sup>, Christopher H. Bohrer<sup>2, 3, #b</sup>, Nicolás Yehya<sup>3</sup>, Hunter Hendrix<sup>3</sup>, Lior Shachaf<sup>2</sup>, Jian Liu<sup>4</sup>,  
Jie Xiao<sup>3</sup>, and Elijah Roberts<sup>2, #c</sup>

<sup>1</sup> Department of Biomedical Engineering, Johns Hopkins School of Medicine, Baltimore, Maryland, United States of America

<sup>2</sup> Department of Biophysics, Johns Hopkins University, Baltimore, Maryland, United States of America

<sup>3</sup> Department of Biophysics and Biophysical Chemistry, Johns Hopkins School of Medicine, Baltimore, Maryland, United States of America

<sup>4</sup> Center for Cell Dynamics, Department of Cell Biology, Johns Hopkins University School of Medicine, Baltimore, Maryland, United States of America

<sup>#a</sup> Current Address: Center for Biophysics and Quantitative Biology, University of Illinois at Urbana-Champaign, Urbana, Illinois, United States of America

<sup>#b</sup> Current Address: Laboratory of Receptor Biology and Gene Expression, Center for Cancer Research, National Cancer Institute, National Institutes of Health, Bethesda, Maryland, United States of America

<sup>#c</sup> Current Address: 10x Genomics Inc., Pleasanton, California, United States of America

\* To whom correspondence should be addressed to: [yuncong5@illinois.edu](mailto:yuncong5@illinois.edu)

## Abstract

In *Escherichia coli*, translocation of RNA polymerase (RNAP) during transcription introduces supercoiling to DNA, which influences the initiation and elongation behaviors of RNAP. To quantify the role of supercoiling in transcription regulation, we develop a spatially resolved supercoiling model of transcription, describing RNAP-supercoiling interactions, topoisomerase activities, stochastic topological domain formation, and supercoiling diffusion in all transcription stages. This model establishes that transcription-induced supercoiling mediates the cooperation of co-transcribing RNAP molecules in highly expressed genes. It reveals that supercoiling transmits RNAP-accessible information through DNA and enables different RNAP molecules to communicate within and between genes. It thus predicts that a topological domain could serve as a transcription regulator, generating substantial transcription bursting and coordinating communications between adjacent genes in the domain. The model provides a quantitative platform for further theoretical and experimental investigations of how genome organization impacts transcription.

## Author Summary

DNA mechanics and transcription dynamics are intimately coupled. During transcription, the translocation of RNA polymerase overwinds the DNA ahead and underwinds the DNA behind, rendering the DNA supercoiled. The supercoiled DNA could, in return, influence the behavior of the RNA polymerase, and consequently the amount of mRNA product it makes. Furthermore, supercoils could propagate on the DNA over thousands of base pairs, impacting RNA polymerase molecules at faraway sites. These complicated interplays between supercoiling and RNA polymerase makes supercoiling an important transcription regulator. To quantitatively investigate the role of supercoiling in transcription, we build a spatially resolved model that links transcription with the generation, propagation, and dissipation of supercoiling. Our model reveals that supercoiling mediates transcription at multiple length scales. At a single-gene scale, we show that supercoiling gives rise to the collective motion of co-transcribing RNA polymerase molecules, supporting recent experimental observations. Additionally, large variations in mRNA production of a gene can arise from the constraints of supercoiling diffusion in a topological domain. At a multi-gene scale, we show that supercoiling

43 dynamics allow two adjacent genes influence each other's transcription kinetics, thus serving as a transcription  
44 regulator.

## 45 **Introduction**

46 Recent studies show that in *E. coli* the chromosomal DNA is under torsional stress. A relaxed DNA  
47 (with every 10.5 bp per turn [1]) becomes torsionally stressed if it is underwound (negatively supercoiled) or  
48 overwound (positively supercoiled). In cells, the chromosomal DNA is held in a homeostatic, negatively  
49 supercoiled state globally by the coordination of topoisomerases [2, 3]. However, DNA-related processes  
50 such as replication and transcription could drive the local supercoiling state away from its equilibrium. For  
51 example, the twin-domain model of transcription depicts that during elongation, RNA polymerase (RNAP)  
52 overwinds the DNA downstream and underwinds the DNA upstream to generate positive and negative  
53 supercoiling respectively, leading to the build-up of DNA torsional stresses in the vicinity of RNAP [4, 5].  
54 During this process, RNAP "encodes" torsional information on the DNA. If the torsional stress is not  
55 relieved in a timely manner, it could propagate through the DNA and influence the behavior of other DNA-  
56 bound RNAP molecules from afar [6]. RNAP "retrieves" the torsional information by adapting its initiation  
57 and elongation behaviors in response to local supercoiling. Many promoters display supercoiling sensitivity  
58 [7, 8, 9], and high torsional stress could slow down [8] or even stall [10, 11] elongating RNAP molecules.

59 The unique property of supercoiling to store and transmit RNAP-accessible information makes it a  
60 medium for RNAP molecules on the same transcription unit or even different operons kilobases away to  
61 communicate with each other [12, 13]. Therefore, supercoiling has been proposed to serve as a transcription  
62 regulator across multiple distance scales from a few to thousands of base pairs, giving rise to many emergent  
63 properties in transcription.

64 At the single-gene scale, supercoiling is proposed to coordinate the collective motion of RNAP  
65 molecules during elongation, enabling RNAP to move at different speeds with different initiation rates. The  
66 promoter strength, in this case, emerges as a regulator for the elongation speed. Kim *et al.* [13] found that  
67 strong promoters facilitate the processivity of RNAP when the promoter is on and inhibits the processivity of

68 RNAP when the promoter is off. The authors hypothesized that during transcription, opposite supercoils  
69 generated in the region between two adjacent RNAP molecules can cancel out with each other quickly,  
70 reducing the torsional stress in the region and hence making the translocation of both RNAP molecules  
71 faster.

72 At the multi-gene scale, supercoiling could mediate the interaction between multiple closely arranged  
73 genes. Genome-wide evidence of correlation of transcriptional activity between neighboring genes has been  
74 detected [14, 15], and the transcription of gene cassettes inserted in the *E. coli* genome was found to depend  
75 strongly on the transcription activity of adjacent genes at the insertion site [16, 17]. It is suggested that  
76 supercoiling plays a role in producing the correlation — transcribing RNAP molecules of adjacent genes  
77 keep rewriting the intergenic supercoiling profile and preventing their dissipation, hence enabling  
78 neighboring genes to "feel" and affect the transcription of each other through the sharing of the same  
79 torsional stress state [14, 15, 16].

80 Supercoiling could also regulate the transcription of genes belonging to the same topological  
81 domains. In *E. coli* cells, there are about 400 topological domains of an average size of ~10kb [18, 19],  
82 which are likely formed by the dynamic looping and unlooping of the intervening DNA due to the binding  
83 and unbinding of nucleoid-associated proteins. Those proteins, by the nature of their binding to the DNA,  
84 restrict the diffusion of supercoiling and hence constrain torsional stress within topological domains.  
85 Supporting this possibility, theoretical work has shown that the opening and closing of a topological domain  
86 could lead to transcriptional bursting [20] and correlate gene transcription in the same domain [21].

87 Although supercoiling is proposed to mediate the communication between multiple RNAP molecules  
88 and multiple genes, it is not clear how supercoiling dynamics lead to changes in transcription activities  
89 quantitatively and how these changes are dependent on the mechanical properties of DNA and the  
90 transcription kinetics of RNAP. Several models [20, 21, 22, 23, 24, 25, 26, 27] have been established to  
91 explore the role of supercoiling in transcription regulation. However, none of these models fully captured the  
92 complex interactions between transcription and supercoiling. Instead, they mainly focused on a subset of key

93 aspects, such as the contribution of supercoiling to transcription initiation [21, 23, 24, 26] or elongation [20,  
94 22, 25, 27] only. Here we present a spatially resolved, chemical master-equation based model of *E. coli*  
95 transcription that explicitly describes all stages of transcription (initiation, elongation, and termination, **Fig**  
96 **1A-C**), and their interplay with DNA supercoiling and other cellular processes that regulate DNA torsional  
97 stress (topoisomerase activity, supercoiling diffusion, and the dynamical formation and dissociation of  
98 topological domains, **Fig 1D-G**). This comprehensive model integrates the most recent experimental  
99 observations of the relationships between transcription and supercoiling.

100 Using this model, we quantitatively established that inter-RNAP supercoiling dynamics could fully  
101 account for the cooperation of co-transcribing RNAP molecules. We also predicted that by confining  
102 supercoiling diffusion, a topological domain can give rise to bursty transcription of genes within the domain.  
103 Furthermore, transcription-induced supercoiling leads to complex communications between two closely  
104 arranged genes. Our findings provide insights into how supercoiling regulates gene expression in the context  
105 of promoter architecture and gene arrangement, paving the way to quantitative studies of how genome  
106 organization impact gene expression.

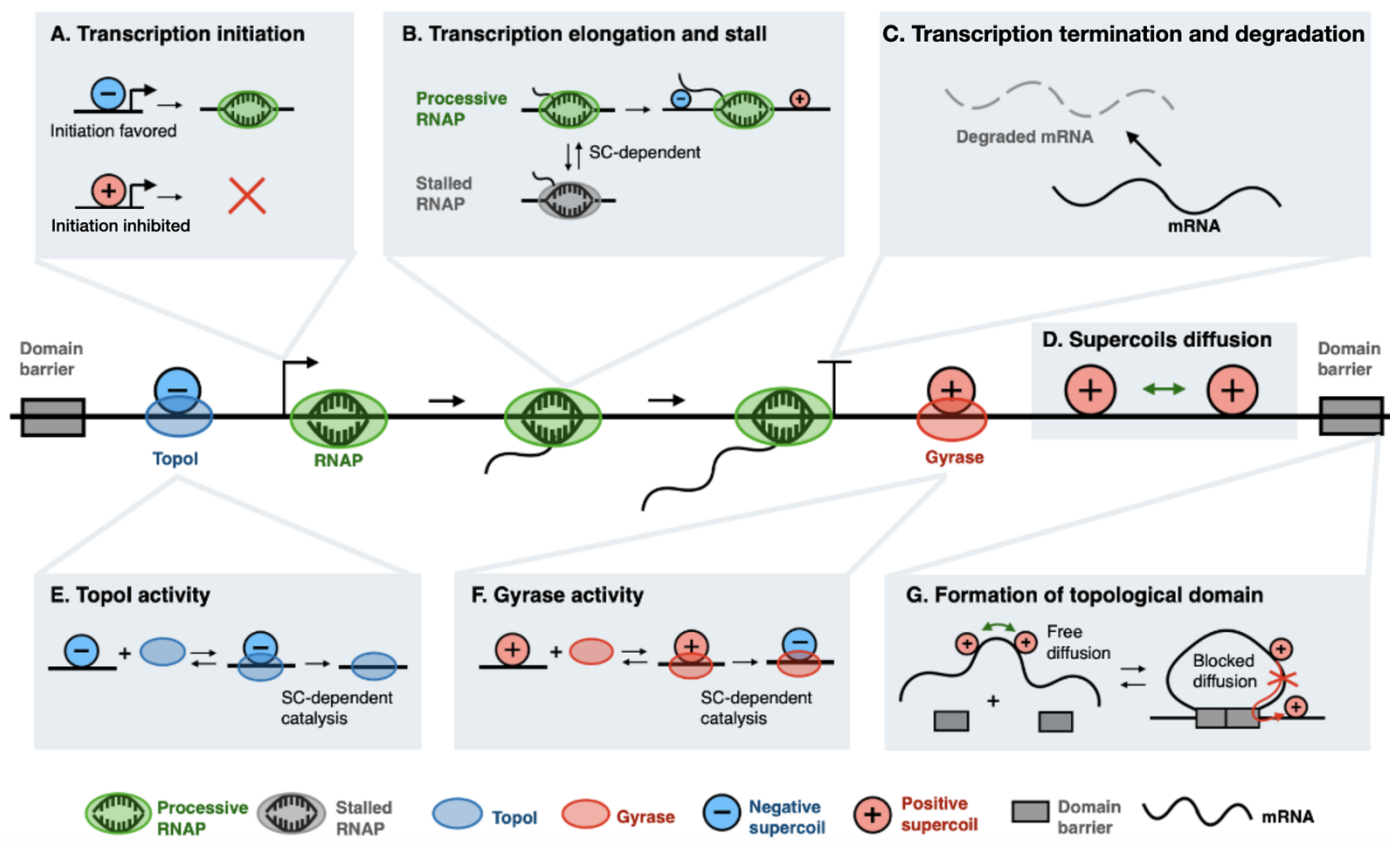

**Fig 1. Model schematics of supercoiling-dependent transcription.** (A) During transcription initiation, a negatively supercoiled (blue circle) promoter is favored over a positively supercoiled (red circle) promoter for RNAP (green oval) binding and open complex formation. (B) During transcription elongation, the translocation of RNAP induces positive supercoiling in front and negative supercoiling behind, which consequently influence whether the RNAP remains processive (green) in elongation or becomes stalled (grey). (C) Transcription terminates when RNAP is released from the mRNA. The transcribed mRNA is degraded subsequently in the model. (D) Supercoils can diffuse on DNA within a topological domain flanked by two domain barriers and interact with RNAP and topoisomerases. (E) Topo I (blue oval) removes one negative supercoil at a time. (F) Gyrase (red oval) converts one positive supercoil to one negative supercoil at a time. (G) Formation and dissolution of a topological domain upon the binding and unbinding of domain anchoring proteins (domain barriers, grey block).

## 119 **Methods**

### 120 **General design of the model**

121 The model describes the mechanochemical feedback between RNAP activities and DNA  
122 supercoiling, where supercoiling controls the chemical reaction rates of RNAP, which in turn modulates the  
123 mechanics of DNA and hence supercoiling. As both the supercoiling and the RNAP molecules diffuse  
124 laterally, such mechanochemical feedback plays out along the DNA. The model thus evaluates how such  
125 feedback modulates and coordinates transcriptions along the DNA. Below we provide the mathematical  
126 formulation of the model.

127 We implemented a modified reaction-diffusion model using chemical master equations, treating the  
128 DNA as a linear 1-D lattice. Specifically, we divided the DNA into a series of 60-bp segments; the choice of  
129 60-bp is a compromise to accommodate the length scale of both RNAP footprint (32 bp) and gyrase  
130 binding site (137 bp) and to minimize computational costs. Supercoils, RNAP or topoisomerase molecules at  
131 different positions of the lattice were considered as different species. This strategy enabled us to describe the  
132 spatial distribution of RNAP, topoisomerases, and supercoils at different positions along the DNA over time.  
133 We performed simulations with exact sampling (Gillespie algorithm) in Lattice Microbes [28], with counts of  
134 species recorded every 1 s. Due to the limited number of species allowed in Lattice Microbes, the maximum  
135 size of DNA we simulated was at  $\sim 20$  kb. The detailed rationale of this strategy can be found in **S1 Text**.

136 To describe the dynamics in the coupling of transcription and supercoiling, we focused on two  
137 questions: (1) how DNA supercoils are generated and dissipated by transcription and other processes, and (2)  
138 how transcription responds to DNA supercoiling. To address the first question, we incorporated into our  
139 model three processes that are known to contribute to the dynamics of DNA supercoiling: (a) diffusion of  
140 supercoils, (b) activities of topoisomerases, and (c) transcription. Topoisomerases regulate supercoiling  
141 globally, transcription perturbs supercoiling locally, and through diffusion, those changes are transmitted  
142 along the DNA. To address the second question, our model considered the supercoiling-sensitive

transcription initiation and elongation. Detailed reaction schemes are described below. All model equations and parameters can be found in **S1 Table**, **S2 Table** and **S3 Table**.

## Modeling diffusion of supercoiling

DNA torsional stress can be stored in the form of either twist or writhe [29]. Twist is the rotation of DNA around its rise axis. Writhe is the cross-over of DNA double-helix with each other. When a sufficiently high torque is applied to DNA, instead of twisting, DNA will wrap around itself to form writhes, since the energetic cost of bending becomes lower than that of twisting [30] (**S1 Fig**). Further increases in the torque will cause the writhes to pile up and form plectonemes [32]. Twists and writhes diffuse differently along DNA. Twists diffuse rapidly along the DNA, with an estimated diffusion constant of  $50 \sim 180 \mu\text{m}^2 \cdot \text{s}^{-1}$  [34, 35]. Writhes diffuse slowly, with a very small diffusion coefficient ( $D$ ) of  $0.01 \sim 0.2 \mu\text{m}^2 \cdot \text{s}^{-1}$ , according to *in vitro* experiments performed by Loenhout *et al.* [33]. Because DNA exists mostly in the form of writhes (or plectonemes) under physiological conditions [36], we assume that torsional stress diffuses relatively slowly.

In our model, we used "supercoiling density" ( $\sigma$ ) to quantify the level of torsional stress, and we used the universal term "turns" to represent both twists and writhes. Supercoiling density is defined as  $\sigma = \frac{Lk - Lk_0}{Lk_0}$ , where  $Lk$  is the actual number of turns in the DNA segment, and  $Lk_0$  is the number of turns in the DNA when it is fully relaxed (one turn per 10.5 bp). A relaxed, 60 base pair DNA segment has a  $Lk_0$  at  $60 \text{ bp} / (10.5 \text{ bp/turn}) = 5.7 \text{ turns/segment}$ . In the *E. coli* chromosome, the average supercoiling density  $\sigma$  is at  $-0.05 \sim -0.07$  [3], corresponding to a  $Lk$  at  $\sim 5.4 \text{ turns/segment}$ .

We used  $\text{DNA}(k)$  to denote the availability of the  $k$ -th DNA segment.  $\text{DNA}(k)=1$  indicates that the DNA is unoccupied and available for the binding of RNAP, Gyrase or topoisomerase, and  $\text{DNA}(k)=0$  indicates that the DNA segment is occupied by a DNA binding-protein and unavailable. We used  $\text{Turn}(k)$  to track the total number of turns on the  $k$ -th DNA segment. To reduce the computational load, we modeled the



166 diffusion of turns as a biased random walk, which means that we only allowed turns to move down the  
167 gradients:

168 If  $\text{Turn}(k) > \text{Turn}(k-1)$  and  $\text{DNA}(k-1)=1$  (unoccupied), the turns on the  $k$ -th segment diffuse to  $(k-1)$ -th  
169 segment:

$$170 \quad \text{Turn}(k) \rightarrow \text{Turn}(k-1)$$

171 Similarly, if  $\text{Turn}(k) > \text{Turn}(k+1)$  and  $\text{DNA}(k+1)=1$ :

$$172 \quad \text{Turn}(k) \rightarrow \text{Turn}(k+1)$$

173 The rate at which turns diffuse along the DNA segments is determined by the propensity of the above  
174 two reactions and the rate constant for turn displacement,  $k_{drift}$ . We set  $k_{drift}$  as  $50 \text{ s}^{-1}$ , which yields a diffusion  
175 coefficient  $D$  of  $0.02 \mu\text{m}^2 \cdot \text{s}^{-1}$ , in accordance with previously estimated values [33].

## 176 **Parameterizing the binding kinetics and catalytic activities of** 177 **topoisomerases**

178 We decomposed topoisomerase activities into three steps: binding to DNA (with the rate constant of  
179  $k_{bind}$ ), catalysis (with the rate constant of  $k_{cat}$ ), and dissociation (with the rate constant of  $k_{unbind}$ ). Below we  
180 deduced the values of the three rate constants from the existing data. We assumed that topoisomerase binds  
181 indiscriminately throughout DNA, and only the catalysis rate depends on the local supercoiling density.  
182 Stracy *et al.* [37] recently characterized the binding kinetics of Gyrase in *E. coli* using single-particle  
183 tracking. There are about 300 Gyrase molecules stably bound to the DNA at any time, and the average dwell  
184 time is about 2 s. Since the *E. coli* genome is about 4 Mb, taking a deterministic approximation, we have  
185  $k_{unbind} = 1/(2 \text{ s}) = 0.5 \text{ s}^{-1}$ , and  $k_{bind} = (300/(4 \text{ Mb}/(60 \text{ bp/segment}))) / (2 \text{ s}) = 0.00225 \text{ s}^{-1} \cdot \text{segment}^{-1}$ . Because of  
186 the deterministic approximation, we further corrected  $k_{bind}$  to  $0.0018 \text{ s}^{-1} \cdot \text{segment}^{-1}$  to match published  
187 experimental results [37]. For TopoI's binding kinetics, no experimental measurements are available,  
188 therefore we approximated the unbinding rate of TopoI as the same of Gyrase, and treated the binding rate as  
189 a free parameter. The response of catalysis activity to supercoiling density  $k_{cat}(\sigma)$  for both TopoI and Gyrase  
190 was parameterized from the DNA relaxation assays (**S1 File**) [8, 38].

## Modeling the effects of transcription on supercoiling

In *E. coli*, a transcribing RNAP molecule usually forms a macromolecular complex with a nascent mRNA molecule, translating ribosomes, and newly translated peptides. As such, a transcribing RNAP molecule is, in general, considered as a topological barrier that blocks the diffusion of supercoiling. A transcribing RNAP molecule can travel linearly along the DNA to generate torsional stress, and/or counterrotate to release torsional stress. Our model considers both situations as described below.

Assuming that an RNAP molecule does not rotate at all, the linking number upstream and downstream of it would be conserved. As a result, when an RNAP molecule travels along the DNA, it will push all the turns downstream forward instantaneously and introduce torsional stress (**S2 Fig**). Since RNAP displacement is powered by the chemical reactions of NTP's incorporation, and the concentration of NTP is held constant in most cases, we expected a constant translocation rate ( $60 \text{ bp}\cdot\text{s}^{-1}$ ). To avoid collisions between multiple RNAP molecules and the turns of each DNA segment pushed by RNAP, we only allowed displacement of RNAP molecules to occur when the two downstream segments (namely, DNA(k+1) and DNA(k+2)) are not occupied by other RNAP molecules.

In addition to directly displacing turns on adjacent DNA segments, RNAP could also counterrotate itself to release torsional stress [8]. In the *in-vitro* study by Chong *et al.* [8], it was observed that the transcription initiation rate of a circular DNA remained constant in the absence of topoisomerase even when both ends were fixed to a surface to avoid free rotations. In this case, as an RNAP molecule approaches the end of a gene that is fixed to the surface by biotin tags (serving as topological barriers), an extreme level of positive supercoiling would build to the extent that stalls transcription elongation and subsequently initiation if RNAP does not counterrotate to release the stress. Premature dissociation of RNAP could also be one way to release the torsional stress, but it is unlikely because it is well known that the transcription elongation complex is extremely stable and unlikely to dissociate spontaneously without the help from active release factors *in vivo* [39]. Here we modeled the counterrotation of RNAP using the leaky diffusion of supercoils over RNAP, and we defined the rotation rate  $k_{rot}$  as the leaky diffusion rate (**S2 Fig**). Since we know very

216 little about the rotation rate of RNAP, we kept it as a free parameter. We also assume that RNAP's  
217 displacement and rotation are uncoupled.

## 218 **Modeling supercoiling-sensitive transcription initiation**

219 Open complex formation is a crucial step in transcription initiation, and promoter-melting is favored  
220 by negatively supercoiled DNA [7]. Recently, using *in vitro* single-molecule fluorescence *in-situ*  
221 hybridization (smFISH), Chong *et al.* [8] confirmed that both the T7 RNAP and the *E. coli* RNAP have  
222 supercoiling-sensitive initiation rates. These experiments motivated theoretical studies to quantify the  
223 influence of supercoiling on transcription initiation. By adopting a statistical mechanics model, Bohrer *et al.*  
224 [21] approximated the initiation rate  $k_i(\sigma)$  by a linear function of the supercoiling density  $\sigma$  at the promoter.  
225 This model quantitatively recapitulated the dynamics of initiation rate observed by Chong *et al.* [8]. We  
226 leverage this formulation here to describe the supercoiling-sensitive initiation:

$$227 \quad k_i(\sigma) = \begin{cases} k_{min} & \sigma \geq 0 \\ k_{min} + (k_{max} - k_{min}) \cdot \frac{\sigma}{\sigma_*} & \sigma_* \leq \sigma \leq 0 \\ k_{max} & \sigma \leq \sigma_* \end{cases}$$

228 Where  $\sigma^*$  is a critical level of negative supercoiling density at which the initiation rate reaches its  
229 maximum. The initiation rate reaches its minimum when DNA is fully relaxed or further positively  
230 supercoiled. In the following simulations,  $\sigma^*$  is held at -0.06.

## 231 **Modeling supercoiling-sensitive transcription elongation**

232 During transcription, the change in downstream and upstream DNA supercoiling generated by RNAP  
233 translocation will introduce torque around the RNAP. When the torque is beyond a certain threshold, RNAP  
234 will stall instantaneously. After the torque is released, transcription will resume. Ma *et al.* [10, 11] has shown  
235 that *E. coli* RNAPs can endure torques up to about  $10.5 \text{ pN} \cdot \text{nm}$ . We used this value as the stall torque  
236 threshold. In our model, the torque that an RNAP molecule faces was calculated from the supercoiling  
237 density, and the details can be found in **S1 File**.

238 Besides torque, we also assumed that an elongating RNAP molecule could stall under other  
239 circumstances caused by extreme supercoiling densities. For example, when the upstream DNA is hyper-  
240 negatively supercoiled, R-loop might form between the template strand and the nascent mRNA [40], and  
241 hence arrest RNAP [41]. Additionally, when downstream DNA is hyper-positively supercoiled, the free  
242 energy required to melt DNA could be extremely high for RNAP to proceed [8]. To account for these effects,  
243 we set  $\sigma = \pm 0.6$  as the supercoiling density threshold that leads to stalled RNAP.

## 244 Results

### 245 RNAP Translocation-induced supercoiling mediates the collective 246 behaviors of co-transcribing RNAP molecules

247 Kim *et al.* [13] found that "communication" between co-transcribing RNAP molecules on highly  
248 expressed genes manifests in two forms: cooperation and antagonism. Cooperation is the phenomenon that  
249 when the promoter is on (i.e., there is a continuous transcription initiation), each transcribing RNAP  
250 molecule elongates faster than the case when it moves solo. Antagonism is the phenomenon that when the  
251 promoter is off (i.e., no new transcription initiation), existing transcribing RNAP molecules elongate  
252 significantly slower than the case when the promoter is on. Kim *et al.* proposed that these phenomena were  
253 due to the presence or absence of continuous loading of RNAP molecules onto the genes: the upstream  
254 negative supercoils produced by the last RNAP molecule could be rapidly canceled out by the downstream  
255 positive supercoils generated by a newly loaded RNAP molecule if the promoter is on, reducing the torsional  
256 stress, but remain unresolved if the promoter is turned off.

257 To explore whether the dynamics of transcription-induced supercoiling could indeed account fully for  
258 those collective behaviors, we simulated the transcription of *lacZYA* (the same systems used in Kim *et al.*  
259 [13]) centered in a 9 kb-long open domain, with both ends relaxing to the equilibrium supercoiling density -  
260 0.067 [3] rapidly (every 0.02 s). The rotation rate of RNAP was set at  $0.2 s^{-1}$ , and the Topo I binding rate as  
261 10 times of the Gyrase binding rate. To represent promoters with different strengths, we varied the maximum  
262 initiation rate constant  $k_{max}$  from  $0.001 s^{-1}$  to  $0.2 s^{-1}$ , which is within the strength range of *E. coli* promoters

[42]. The minimum initiation rate constant  $k_{min}$  was held as  $0.001 \text{ s}^{-1}$  for all simulations. The elongation rate of a group of RNAP molecules is defined as the average elongation rate of this RNAP group.

**Fig 2A** shows that genes under higher initiation rates tend to have high elongation rates as well, recapitulating the cooperative behavior of RNAP molecules. Importantly, the cooperation is non-additive, i.e., the elongation rate "saturates" when the initiation rate is sufficiently high, which agrees with Kim *et al.*'s observations [13]. Consistent with this observation, the correlation in the displacement of adjacent RNAP molecules increased and plateaued at high initiation rates (**Fig 2B, Supplementary Notes, Fig. SX**), indicating that RNAP tends to adjust its speed to mimic the speed of its neighbors, i.e., "cooperating" with each other. The distance between adjacent RNAP molecules continued to decrease in response to increased initiation rate (**Fig 2C**). Interestingly, the average distance between two adjacent RNAP molecules was around 500 bp when the elongation rate reached the plateau and continued to decrease further in response to increased initiation rates, indicating that the full cooperation between adjacent RNAP molecules could operate over a distance of  $> 500 \text{ bp}$ .

To determine how supercoiling contributes to the observed cooperation, we analyzed the supercoiling density and resisting torque distributions in the immediate vicinity of a transcribing RNAP molecule under the conditions of low, medium, and high initiation rates ( $k_{ini} = 0.001, 0.019, \text{ and } 0.131 \text{ s}^{-1}$ ) respectively (**Fig 2D**). At the low initiation rate, while the supercoiling densities upstream and downstream of a transcribing RNAP are relatively low ( $\sim \pm 0.1$ ), they produce large positive torques around the RNAP molecule (**Fig 2D**, left column), therefore decreasing the elongation rate and frequently stalling the RNAP molecule (red bars). As the initiation rate increases, the supercoiling densities around RNAP molecules also increase, but the corresponding torque decreases and becomes negative at the highest initiation rate (**Fig 2D**, middle and right columns) due to the cancellation of opposing supercoils between adjacent RNAP molecules. Consequently, majority of RNAP molecules under these conditions move processively with high elongation rates (green bars). Therefore, the reduced resisting torque can fully account for RNAP's cooperation in highly expressed

287 genes. A full comparison of supercoiling density and torques under all initiation rate conditions is shown in

288 **S3 Fig.**

289 To further illustrate the cooperative behavior of RNAP and its relationship with local supercoil  
290 density and torque, **Fig 2E** shows three exemplary kymographs of RNAP's translocation trajectories at the  
291 three different initiation rates. When the initiation rate is low ( $0.001\text{ s}^{-1}$ , **Fig 2E**, left), the overall  
292 supercoiling density of the DNA (negative upstream in blue and positive downstream in orange) is  
293 maintained at a relatively low level. However, these supercoils accumulate on both sides and generate high  
294 torques to stall the transcribing RNAP molecule frequently (vertical lines in trajectories). Interestingly, when  
295 a new RNAP molecule starts transcribing (left most trajectory at  $\sim 850\text{ s}$  in the simulation), the previously  
296 slow-moving RNAP molecule (indicated by \*) started elongating faster than before and its speed became  
297 similar to that of the new RNAP molecule, indicating cooperation. Under a high initiation rate ( $0.068\text{ s}^{-1}$ , **Fig**  
298 **2E**, right), the overall supercoiling density on the DNA template is high especially in the immediate  
299 upstream and downstream regions (dark blue or orange colors), but the torque that each RNAP molecule  
300 faces is low because the difference of the supercoiling density between the two sides of an RNAP molecule  
301 is small. Note that we also observed the antagonistic behavior of RNAP in these simulations, such as the one  
302 at  $\sim 920\text{ s}$  in the middle kymograph (initiation rate =  $0.009\text{ s}^{-1}$ , **Fig 2E**, middle), in which when the leading  
303 RNAP molecule finishes its transcription, the speed of the trailing one reduces drastically.

304 To further confirm the above effect, we increased Topo I activity in the same simulations and found that  
305 it could diminish the enhancement effect as what was shown in Kim *et al.* [13] (**S6 Fig**). This result is because  
306 when Topo I activity is too strong (for example, when the Topo I binding rate is 1000 times the Gyrase binding  
307 rate), negative supercoils generated by a leading RNAP molecule will be rapidly removed even before they  
308 cancel out with positive supercoils generated by the trailing RNAP molecule.

309 Note that two recent theoretical models [26, 27] also reproduced the cooperation between groups of  
310 RNA polymerases. However, these two models adopted different assumptions from ours. Both studies assumed  
311 that RNAP velocity is directly dependent on torsional stress [26, 27], with one study specifying no RNAP

312 counterrotation to allow diffusion of supercoiling [27]. These assumptions may not represent the actual  
 313 biological picture, as a previous study has shown that torsional stress does not cause the measured inter-stall  
 314 velocity of RNAP to vary significantly other than inducing stall [10] (see **Discussion** for details). We also  
 315 showed that zero RNAP counterrotation is not necessary for a cooperative behavior: in our simulation, as long  
 316 as RNAP counterrotates slowly ( $k_{rot} \leq 1 \text{ s}^{-1}$ ), the cooperation remains (**S7 Fig**).

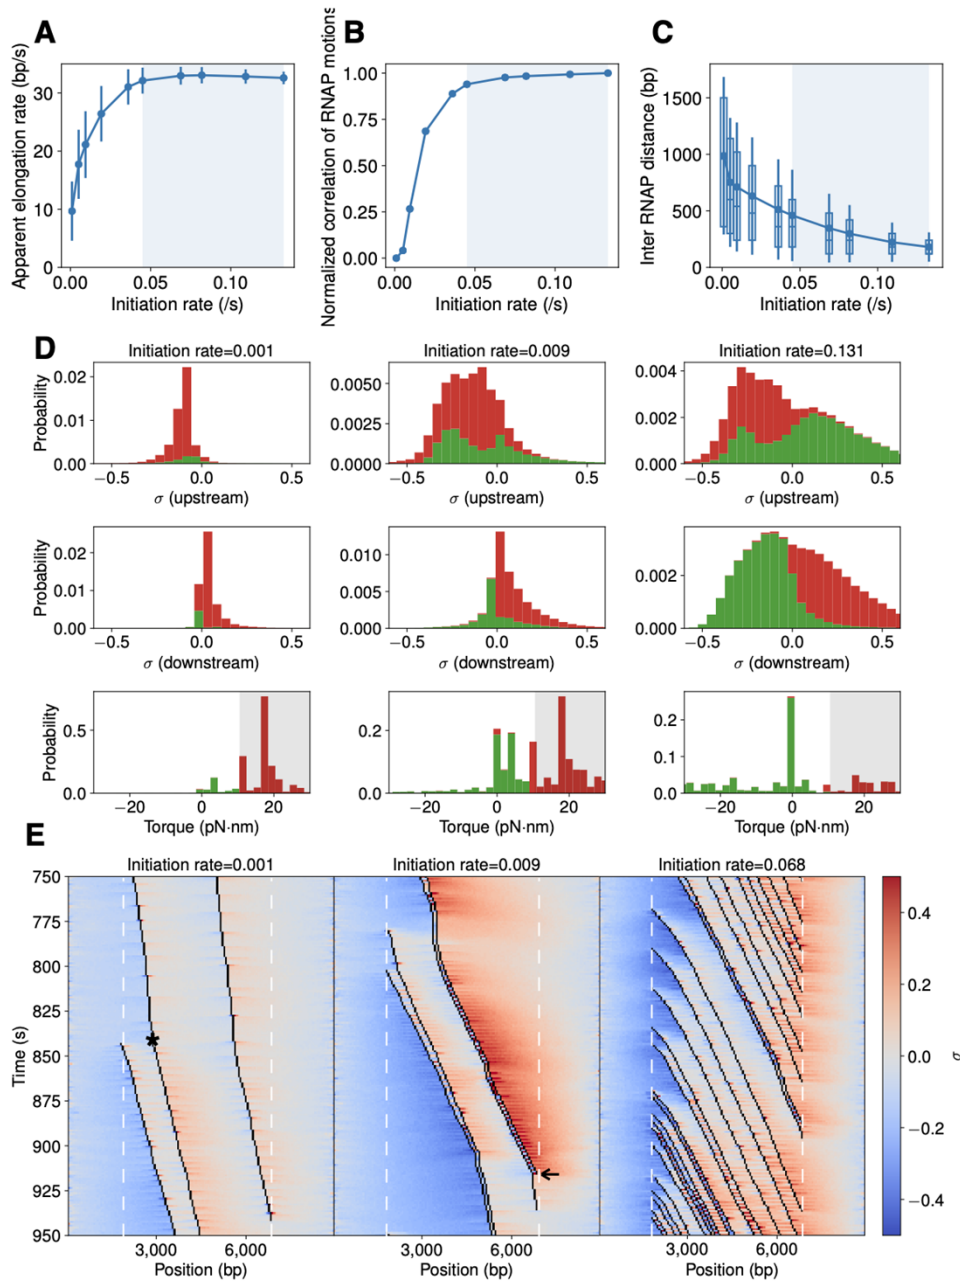

317

318

319

**Fig 2. Cooperation of RNAP transcription is favored by high initiation rates and antagonized by low initiation rates.** (A) The apparent RNAP elongation rate increases and reaches maxima (blue shaded region) as

the initiation rate increases. Error bars are standard deviations from (x simulations?). (B) Pearson correlation coefficient of adjacent RNAP trajectories increases and approaches unity (blue shaded region) as the initiation rate increases. The correlation coefficient is normalized such that “0” corresponds to the case of independently transcribing RNAP trajectories and “1” corresponds to the case of the co-transcribing RNAP trajectories in the highest expressed gene. The unnormalized curve is in **S4 Fig**. (C) The mean distance (dots in boxes) between neighboring RNAP molecules decreases as the initiation rate increases. When the maximal cooperation is reached (intersect with blue shaded region, initiate rate at which maximal elongation rate is reached) the distance is ~ 500 bp. Box borders indicate first and third quartiles of the data, vertical lines standard deviations, and horizontal lines in the box media. (D) Stacked histograms of supercoil density upstream (top), downstream (middle) and torque (bottom) RNAP molecules face during transcription. Supercoil densities of processive and stalled RNAP molecules are shown in green and red, respectively. The torque value above the stall threshold is shaded in grey. (E) Representative kymographs of RNAP translocation trajectories (black lines) with the corresponding supercoiling density (positive in orange and negative in blue) in its vicinity. A time interval of 750 – 950 s was chosen to maintain a constant mean mRNA copy number at a steady-state under each condition (**S5 Fig**). The slope of the trajectory reflects the elongation speed of the associated RNAP molecule. Left and right white dashed lines indicate the start and end positions of the transcribing region, respectively. The asteroid in the left kymograph indicates that a slow-moving RNAP molecule started to move with a higher speed after a new RNAP molecule is loaded at the promoter on the left. The arrowhead in the middle kymograph indicates a transcribing RNAP molecule drastically reduces its elongation speed after the leading RNAP (right) terminates its transcription and dissociates.

## **Supercoiling accumulated in a topological domain modulates transcriptional noise**

Bacterial transcription exhibits a large cell-to-cell variability [43, 44, 45, 46], allowing a population of isogenic cells to exhibit heterogenous phenotypes and responses to various stimuli [47]. The variability comes from either the stochastic nature of molecular reactions (intrinsic noise) or the variation in molecule copy numbers in different cells (extrinsic noise) [48]. Here we are interested in understanding how supercoils



346 accumulated in a topological domain could function as an additional factor to contribute to the intrinsic noise  
347 in the mRNA production of a gene. We characterize the transcriptional noise by the Fano factor of mRNA  
348 copy number, which equals one when mRNA's production is a stochastic, Poissonian process of random  
349 birth and death [43]. When mRNAs are produced in bursts due to random activation and inactivation as  
350 observed in both prokaryotes and eukaryotes, the Fano factor is greater than one and reflects the mRNA burst  
351 size [49].

352 We first simulated a 4.2 kb open DNA with a 2.4 kb gene located in the center, with the ends  
353 constrained and relaxing every 0.02 s. As shown in **Fig 3A, B, D and E**, under this condition both weak and  
354 strong promoters yield an mRNA copy number distribution with a Fano factor around 1 due to the stochastic,  
355 Poissonian transcription. When we introduce a topological barrier at 0.06 kb and 4.14 kb, which dynamically  
356 loops (for 5 min) and unloops (for 1 min) the intervening DNA (to mimic realistic chromosomal DNA  
357 dynamics), both the weak and strong promoters show a substantial drop in the mean mRNA production (**Fig**  
358 **3C, F, G, H**). However, the strong promoter exhibits a larger Fano factor in mRNA copy number distribution  
359 than the weak promoter, suggesting that additional transcription noise is introduced (**Fig 3C, F**). The  
360 supercoiling density in the dynamically looping DNA exhibits strong positive or negative values, whereas  
361 that of the open DNA maintains a moderate and relatively constant level (**Fig 3G, H**, bottom panel). Notably,  
362 the mRNA production of the dynamically looping DNA is highly bursty, and each burst corresponds to the  
363 release of accumulated of torsional stress when the loop opens (**Fig 3H**, bottom panel, red shaded region).

364 As in all our simulations we also included the actions of Topo I and Gyrase in these simulations.  
365 However, we observed that topoisomerases cannot effectively alleviate the torsional stress generated by  
366 genes with strong promoters in a topologically constrained DNA loop. The stress is largely released only  
367 when the DNA loop opens. Consistent with this expectation, genes with strong promoters are transcribed  
368 with larger noises under the dynamically looping condition, and the Fano factor increases with the promoter  
369 strength (**Fig 3I**). Additionally, when the loop is closed, the torsional stress reduces the transcription  
370 initiation rate. In contrast, when the loop is open, the torsional stress is released and transcription initiates

371 with high rates (**Fig 3J**). These observations further support the notion that the difference in transcription  
372 activities during the looped and unlooped states underlies bursty transcription and contributes to additional  
373 transcriptional noise in mRNA production.

374 We note that previous works [21, 25] attributed transcription bursting to the binding and unbinding of  
375 Gyrase in a topological domain. This mechanism is based on the assumption that Gyrase's binding is a rare  
376 event compared to the timescale of transcription. Our model suggests that even if the binding and unbinding  
377 of Gyrase are far more frequent than transcription initiation, transcription can still be bursty due to the  
378 topological domain formation and opening. Furthermore, the timescale of domain formation and dissolution  
379 plays a significant role in bursty transcription: the more frequent the DNA switches between looped and  
380 unlooped state, the less bursty transcription is. We show that when the dwell time of looping is reduced from  
381 5 min to 1 min, the Fano factor drops accordingly (**S8 Fig**, green to orange curve); if the DNA is always  
382 looped, the transcription will stay in a nearly dormant state as the torsional stress cannot be released  
383 effectively even in the presence of topoisomerase activities; consequently, the resulting Fano factor is down  
384 to unity (**S8 Fig**, red curve). Note that our model does not exclude the possibility of transcription bursting  
385 resulting from strong topoisomerase binding/unbinding, which is rare [50], but instead provides a mechanism  
386 that can result in transcription bursting independent of topoisomerase activities.

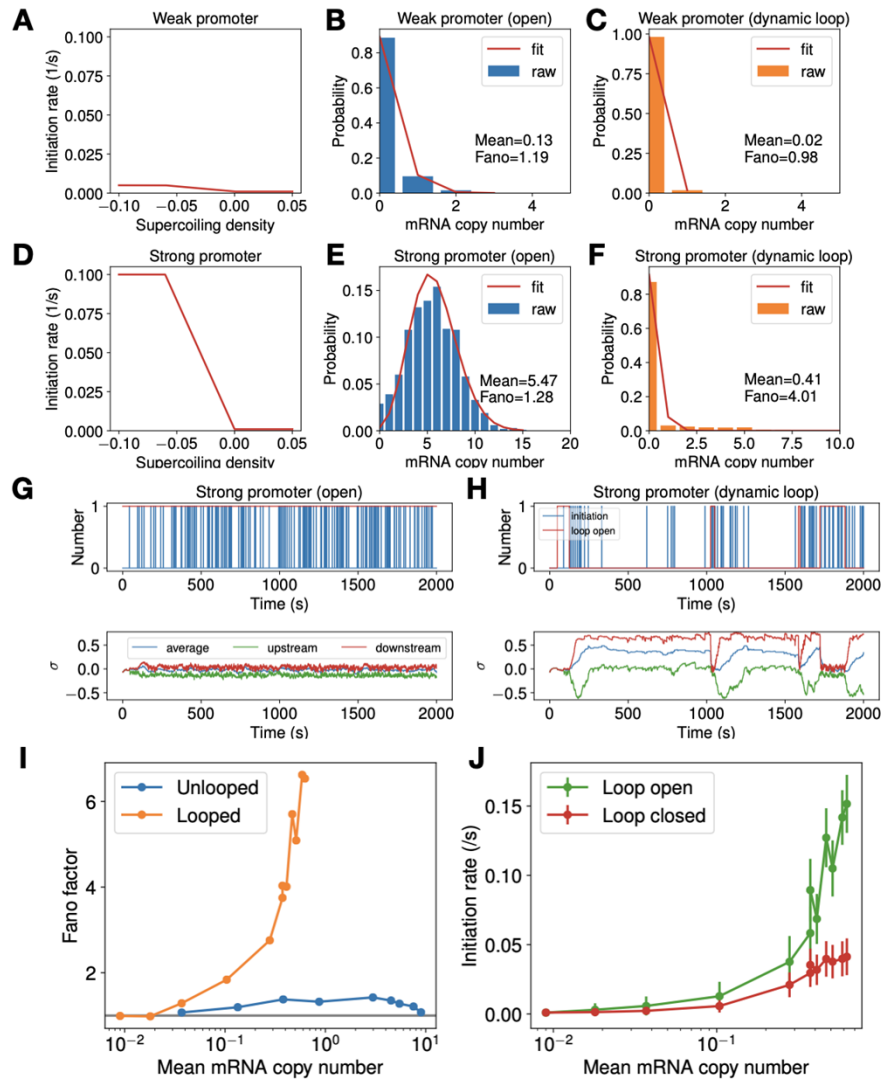

**Fig 3. Dynamic topological domain formation results in bursty and noisy transcription from strong promoters through the accumulation and release of supercoiling.** (A-F) Comparison of a weak promoter ( $k_{max} = 0.005$ , top panel) and a strong promoter ( $k_{max} = 0.1$ , bottom panel) in their responses to supercoil density (A and D), mRNA copy number distribution when the DNA is open (unlooped, B and E) and when the DNA dynamically loops and unloops (C and F). (G-H) Exemplary mRNA production time traces (top panel) and the corresponding supercoil density of the DNA (bottom panel) for the strong promoter in the open-DNA condition (G) and the dynamically looping condition (H). The pink-shaded regions in H indicate the time when the loop is open. (I) Comparison of the Fano factor as a function of mean mRNA copy number for genes in an open DNA (blue) and that in a dynamically looping DNA condition (orange). The grey line denotes Fano factor = 1. (J) Comparison of the average initiation rate of genes when the DNA is open (green) and when the DNA is closed (red) in the dynamically looping DNA condition.

## Intergenic supercoiling mediates communication between two neighboring genes

Previous works show that neighboring genes could influence the transcription of each other, and the interaction is dependent on the relative orientation of the genes [15, 16, 51]. We propose that intergenic supercoiling dynamics may mediate communications between neighboring genes. To investigate this hypothesis, we simulated two genes of the same length (1.2 kb) and promoter strength ( $k_{max} = 0.05 s^{-1}$ ) but arranged differently (convergent, divergent or codirectional) in a 14.4-kb long open DNA. We chose a length of 14.4-kb to accommodate the limited number of species allowed in Lattice Microbes. To examine the effects of supercoiling on transcriptional activities, we also simulated the cases where supercoiling is eliminated by increased topoisomerase activities (**S9 Fig**).

We first analyzed the effects of intergenic supercoiling on mRNA production with the intergenic distance held at 1.2 kb (**Fig 4A**). For convergent and divergent arrangements, since the two genes displayed the same transcription activities due to the symmetry, we only showed the mRNA distribution for the upstream gene. For codirectional genes, we examined the mRNA distribution for both the upstream (trailing) and the downstream (leading) genes. As shown in **Fig 4B**, we observed that the presence of supercoils led to a significant decrease in the mean mRNA production of the genes in the convergent arrangement (leftmost panel, orange bars) but a significant increase for genes in the divergent arrangement (middle panel, orange bars) compared to the condition when supercoils on the DNA are eliminated efficiently by topoisomerase activities (blue bars). For the upstream gene in the codirectional arrangement (second panel from the right), mRNA production only exhibited a slight decrease in the presence of supercoiling. For the downstream gene in the codirectional arrangement, however, we observed a significant decrease in mRNA production (rightmost panel). These results demonstrate that supercoiling indeed influences the transcription activity of genes in different orientations differentially.

To examine how supercoiling contributes to the above observations, we plotted intergenic supercoil density distributions of these genes in **Fig 4C**. For convergent genes (left panel), the intergenic region is

424 dominated by positive supercoils, which are produced by the transcription-induced supercoiling downstream  
 425 of both genes, and hence inhibiting the transcription of both genes. In contrast, the region between divergent  
 426 genes is dominated by negative supercoils (middle panel), which are produced upstream by the promoters of  
 427 both genes, hence boosting transcription initiation for both genes. For codirectional genes, the intergenic  
 428 region is also dominated by positive supercoiling (right panel), although the densities are lower compared to  
 429 that of convergent genes. This is an interesting observation, because intuitively one would expect that  
 430 positive supercoils produced by the upstream gene and the negative supercoils produced by the downstream  
 431 gene would cancel each other, leading to relaxed intergenic DNA. In reality, however, the upstream gene will  
 432 roughly maintain its transcription activity over time since its promoter supercoiling is frequently reset by the  
 433 default negative supercoiling from the chromosome end. On the other hand, the downstream gene will  
 434 experience a decline in transcription due to the immediate suppression of transcription initiation by the  
 435 relaxed intergenic DNA. This difference gives rise to a positive feedback loop where the increased positive  
 436 supercoiling produced by the upstream gene further decreases the initiation rates of the downstream gene.  
 437 Consequently, the upstream gene does not change its mRNA production level dramatically, but the  
 438 downstream gene decreases its mRNA production level.

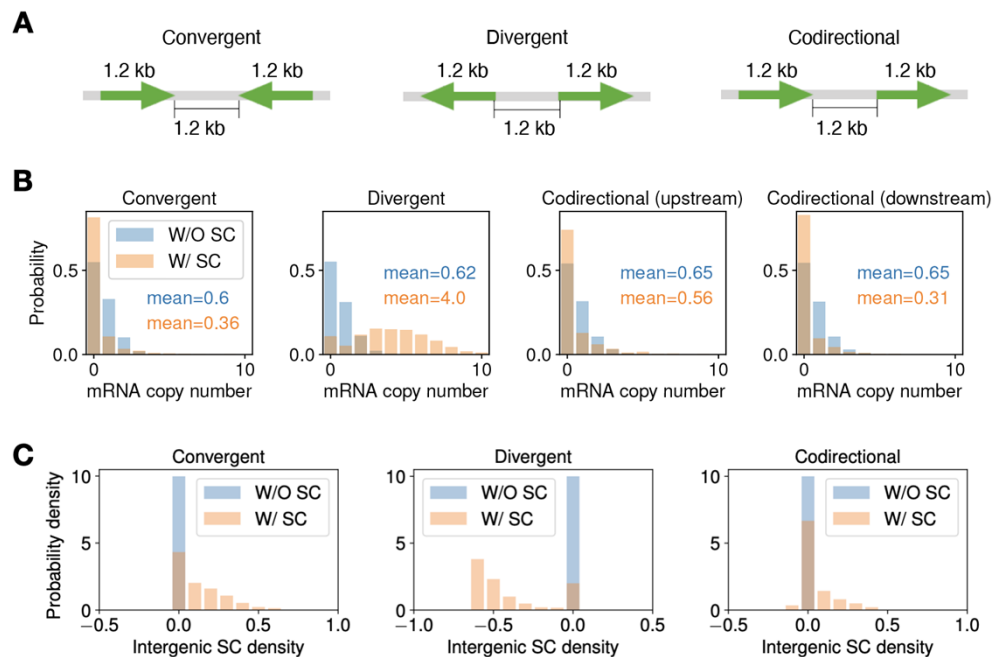

440 **Fig 4. Intergenic supercoiling affects the level of mRNA production of two neighboring genes.** (A) The  
441 construct for convergently, divergently and codirectionally arranged genes with the intergenic length fixed at  
442 1.2 kb. The mRNA copy number distribution (B) and intergenic supercoiling distribution (C) for cases with  
443 (orange bar) and without (blue bar) intergenic supercoiling.

444 Based on the above results, we reasoned that the presence of supercoiling should also render mRNA  
445 production of one gene sensitive to changes in the initiation rate of the other adjacent gene. To examine this  
446 hypothesis, we varied the initiation rate of one gene (**Fig 5A**) and monitored the resulting mRNA production  
447 levels of the other gene (**Fig. 5B**), the intergenic supercoiling density (**Fig. 5C**), and the correlation between  
448 the mRNA copy numbers of the two genes over time (**Fig. 5D**) for the three gene arrangements.

449 For convergent genes (leftmost, **Fig 5B**), as we increased the initiation rates of one gene, the mean  
450 mRNA copy number of the other gene first remains nearly unchanged, and then decreases. This result is  
451 likely because when the initiation rate of the first gene is high ( $k_{max} = 0.1 s^{-1}$  or  $0.2 s^{-1}$ ), the intergenic region  
452 become significantly positively supercoiled (leftmost, **Fig 5C**), inhibiting the transcription of the other gene.  
453 For divergent genes (second from the left, **Fig 5B**), we observed that mRNA production increases with the  
454 initiation rate of one gene, likely due to the increased negative supercoils in the intergenic region (second  
455 from the left, **Fig 5C**). For codirectional genes, since the gene arrangement is asymmetric, we modulated the  
456 initiation rates for both the upstream gene and the downstream gene separately. When the initiation rate of  
457 the downstream gene is increased, we observed an increase in the mRNA production of the upstream gene  
458 (third from the left, **Fig 5B**), and no change in the intergenic supercoiling density (third from the left, **Fig**  
459 **5C**). The homeostasis in intergenic supercoiling density suggests a feedback loop: the more the downstream  
460 gene transcribes, the more negative supercoiling is generated in the intergenic region, the more the upstream  
461 gene is activated, which produces more positive supercoils in the intergenic region to annihilate the negative  
462 supercoils. Conversely, when the initiation rate of the upstream gene is increased, we observed a decrease in  
463 the expression of the downstream gene (rightmost, **Fig 5B**), accompanied with an increased intergenic  
464 supercoiling density (rightmost, **Fig 5C**).

465 Lastly, to quantify the direction and strength of the interaction between two genes, we used the  
466 Pearson correlation coefficient (**Fig 5D**) between the mRNA copy number of the two genes over time.  
467 Convergent genes (left, **Fig 5D**) always maintain a negative correlation, suggesting a mutual inhibition  
468 between the two genes. In contrast, divergent genes (middle, **Fig 5D**) experience a positive correlation when  
469 the initiation rate of the adjacent gene is low to moderate ( $k_{max} = 0.01 s^{-1}$  or  $0.02s^{-1}$ ), suggesting mutual  
470 activation between the two neighboring genes. At very high initiation rate of one gene, however, the  
471 correlation between the two genes became negative, suggesting mutual inhibition between the two genes.  
472 This phenomenon is likely due to the excessive negative supercoiling in the intergenic region, which prevent  
473 RNAP to escape the promoter to engage in elongation, For codirectional genes, a positive correlation is  
474 observed when downstream gene has high transcription activity ( $k_{max} = 0.1 s^{-1}$  or  $0.2 s^{-1}$ , third from the left,  
475 **Fig 5D**), suggesting mutual activation; in contrast, the overall correlation is very small when the upstream  
476 promoter strength is varied (right, **Fig 5D**). These results suggest a positive feedback loop between  
477 transcriptional dynamics and supercoiling mechanics in the codirectional arrangement: the transcription of  
478 the upstream gene inhibits the transcription of the downstream gene, leading to positively supercoiled  
479 intergenic region, which further inhibits the downstream transcription.

480

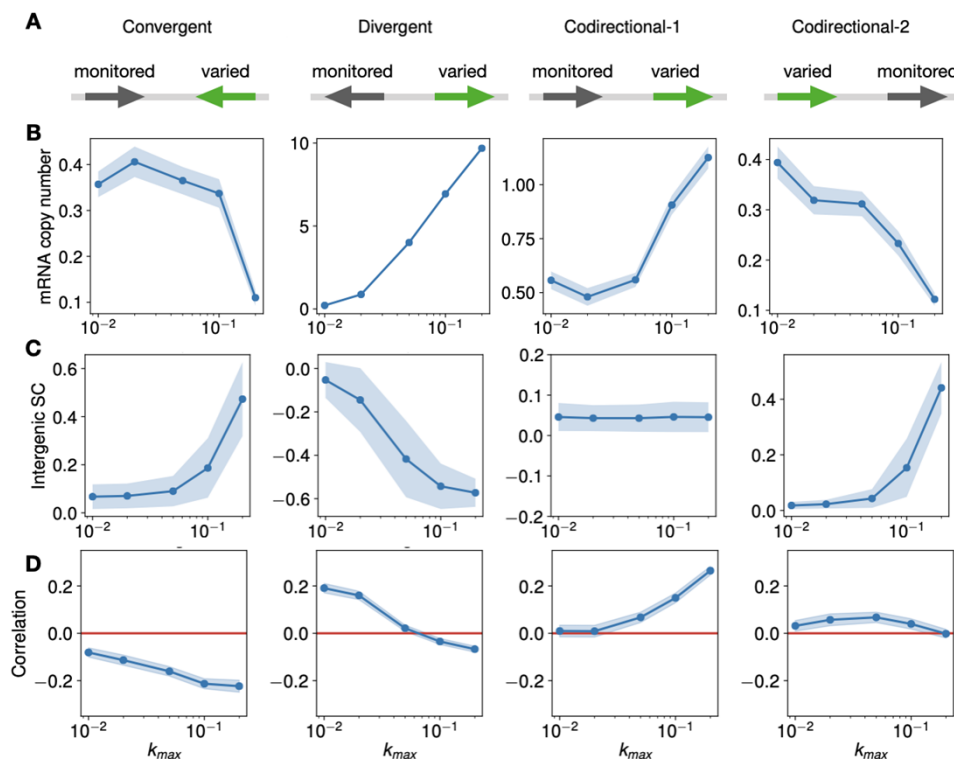

481

482

**Fig 5. The effects of the initiation rate on expression of adjacent genes.** (A) The construct for convergently,

483

divergently and codirectionally arranged genes where the initiation rate of one gene is varied ( $k_{max} = 0.01, 0.02,$

484

$0.05, 0.1, 0.2 \text{ s}^{-1}$ ) and the initiation rate of the other gene is monitored in response to that of the first gene with

485

an upper limit of  $k_{max} = 0.05 \text{ s}^{-1}$ . (B) The mean mRNA copy number of the monitored gene as a function of the

486

maximum initiation rate ( $k_{max}$ ) of the first gene, for the four constructs shown in (A). The dot is the mean and

487

the shaded area is mean  $\pm$  SEM. (C) The intergenic supercoiling density as a function the maximum initiation

488

rate ( $k_{max}$ ) of the adjacent gene. The dot is the mean and shaded area is mean  $\pm$  standard deviation. (D) The

489

Pearson correlation between mRNA copy number of two genes as a function of the maximum initiation rate

490

( $k_{max}$ ) of the gene whose initiation rate is varied. The dot is the mean and the shaded area is mean  $\pm$  SEM.

491

## Discussion

492

In this study, we modeled supercoiling-dependent transcription systems in *E. coli*. This model

493

contains the following unique features. First, both transcription initiation and elongation are supercoiling-

494

sensitive, while previous theoretical models only incorporated one of them [20, 21, 22, 23, 24, 25, 26, 27].

495

Considering that supercoiling-mediated modulation of both initiation and elongation has already been shown

496

experimentally [8, 10, 11], incorporating both processes into the model is necessary and allows us to make



497 accurate quantitative predictions. Second, we provided an explicit description of supercoiling-sensitive  
498 elongation by modeling the stall propensity to be torque-dependent. Ma *et al.* [10] observed that torque could  
499 regulate both RNAP's stall propensity and the velocity for processive RNAP. However, the velocity's  
500 dependence on torque is relatively weak (for example, the velocity only drops from about 24 *bp/s* to about 18  
501 *bp/s* when the torque changes from  $-6 \text{ pN} \cdot \text{ nm}$  to  $7.5 \text{ pN} \cdot \text{ nm}$ ). Hence, we argue that the elongation rate is  
502 mostly regulated by the stall propensity, and the actual change in the velocity is negligible. Third, our model  
503 is pertinent to the realistic biological context. We modeled the explicit molecular events of  
504 binding/unbinding of topoisomerases, including Topo I and Gyrase, formation/dissociation of topological  
505 domains, translocation and counterrotation of RNAP, and diffusion of supercoils along the DNA. Integrating  
506 all these biological events that occur in live cells with physiologically relevant parameters renders the model  
507 explicit in its biological implications.

508 Using this model, we quantitatively reproduced the orchestration between co-transcribing RNAP  
509 molecules over long distances [13]. We showed that the cooperation between RNAP molecules, manifested  
510 by the enhancement in elongation rate in highly expressed genes, is mediated by supercoiling cancellation  
511 and the consequently reduced torque generated by RNAP. We also showed that the enhancement could only  
512 be achieved when RNAP counterrotation is slow, and that TopoI is not overly active. As RNAP would face  
513 sizeable hydrodynamic drag created by nascent transcripts and associated ribosomes under physiological  
514 conditions, the counterrotation could indeed be very slow. Thus, we predict that the cooperative behavior of  
515 co-transcribing RNAP molecules could be a universal feature in *E. coli* gene transcription.

516 We then utilized this model to explore the role of promoter strength and the formation of topological  
517 domain on transcription regulation mediated by supercoiling. Our simulations showed that a dynamically  
518 looped topological domain could reduce the average mRNA production within the domain and add intrinsic  
519 noise to gene transcription in a promoter strength-dependent way. Thus, topological domains could act as  
520 transcription regulators and globally manipulate the distribution of transcription levels. We also provided  
521 another mechanism for transcriptional bursting by the dynamic formation and dissolution of topological

522 domains, which is in addition to Gyrase binding/unbinding as previously proposed [21, 25]. Note that the  
523 necessary condition for supercoiling-mediated transcriptional bursting is that there is enough timescale  
524 separation in supercoiling generation and dissipation. However, the timescale Gyrase binding/unbinding is  
525 still controversial: the *in vitro* study by Chong *et al.* [8] estimated the Gyrase to bind/unbind every several  
526 minutes, while the *in vivo* experiment by Stracy *et al.* [37] observed each binding to span only 2-10 seconds.  
527 If the latter picture is true, Gyrase activity alone will not provide enough time scale separation for  
528 supercoiling generation and dissipation. On the other hand, we also lack the experimental evidence for  
529 topological domain-induced transcriptional bursting: although the stability of several transcription factor-  
530 mediated loops has been measured [52, 53, 54] (such as LacI- or CI-mediated loop, whose stability ranges  
531 from seconds to minutes), the kinetics of other kinds of topological domains (formed by nonspecific  
532 nucleoid-associated proteins like Fis and H-NS [55]) remain largely unknown. More work is needed to  
533 elucidate the mechanism underlying transcriptional bursting.

534 We also analyzed the modulation of mRNA production of one gene by a neighboring gene and its  
535 dependence on the relative orientation of the two genes. We showed that even a simple two-gene system  
536 could yield complex behaviors due to supercoiling dynamics (for example, the asymmetry in gene regulation  
537 in codirectional genes). These behaviors brought about the need to use supercoiling-dependent models in  
538 facilitating the design of synthetic genetic circuits. For example, for convergent genes, we notice that  
539 supercoiling brings a negative correlation to the transcription of the two genes, which means that it is  
540 possible to use convergent genes to enhance the bistability of synthetic toggle switches [56].

541 Finally, we point out that our model reproduced qualitatively but not quantitatively the antagonistic  
542 behavior reported by Kim *et al.* [13]. In our simulations, RNAP molecules do slow down in response to  
543 promoter inactivation when 2700 bp has been transcribed, and the torsional stress is transmitted towards  
544 downstream (left panel, **S10 Fig**). However, the slowdown effect is not as pronounced as observed in the  
545 experiments: the simulated elongation rate reduced from 33 bp/s to 26 bp/s after promoter inactivation, while  
546 the experimentally measured elongation rate reduced from 30 bp/s to lower than 10 bp/s. A sizeable

547 slowdown could be achieved if we make the promoter inactivation earlier: if the promoter is inactivated  
548 when 300 bp is transcribed, the elongation rate of remaining RNAP molecules will reduce to about 10 bp/s  
549 (right panel, **S10 Fig**). Two possible reasons might contribute to this observation. One is that the supercoiling  
550 diffusion coefficient is too small such that the torsional stress is not transmitted fast enough to reach the most  
551 downstream RNAP before transcription termination. Another possible reason is that the binding of multiple  
552 RNAP molecules might make the DNA more rigid, as assumed in [27] -- as a result, the experienced torque  
553 by each RNAP might be larger than we modeled. Further investigations are necessary to identify and  
554 differentiate these potential causes.

## 555 **Acknowledgements**

556 We would like to thank Dr. Taekjip Ha for useful comments on the initial draft.

## 557 **References**

- 558 [1] Mirkin SM. DNA topology: fundamentals. Encyclopedia of Life Sciences. 2001 May 30;111.
- 559 [2] Menzel R, Gellert M. Regulation of the genes for E. coli DNA gyrase: homeostatic control of DNA  
560 supercoiling. Cell. 1983 Aug 1;34(1):105-13.
- 561 [3] Zechiedrich EL, Khodursky AB, Bachellier S, Schneider R, Chen D, Lilley DM, Cozzarelli NR. Roles  
562 of topoisomerases in maintaining steady-state DNA supercoiling in Escherichia coli. Journal of  
563 Biological Chemistry. 2000 Mar 17;275(11):8103-13.
- 564 [4] Liu LF, Wang JC. Supercoiling of the DNA template during transcription. Proceedings of the National  
565 Academy of Sciences. 1987 Oct 1;84(20):7024-7.
- 566 [5] Wu HY, Shyy S, Wang JC, Liu LF. Transcription generates positively and negatively supercoiled  
567 domains in the template. Cell. 1988 May 6;53(3):433-40.
- 568 [6] Nelson P. Transport of torsional stress in DNA. Proceedings of the National Academy of Sciences. 1999  
569 Dec 7;96(25):14342-7.

- 570 [7] Burns H, Minchin S. Thermal energy requirement for strand separation during transcription initiation:  
571 the effect of supercoiling and extended protein DNA contacts. *Nucleic acids research*. 1994 Sep  
572 25;22(19):3840-5.
- 573 [8] Chong S, Chen C, Ge H, Xie XS. Mechanism of transcriptional bursting in bacteria. *Cell*. 2014 Jul  
574 17;158(2):314-26.
- 575 [9] Peter BJ, Arsuaga J, Breier AM, Khodursky AB, Brown PO, Cozzarelli NR. Genomic transcriptional  
576 response to loss of chromosomal supercoiling in *Escherichia coli*. *Genome biology*. 2004 Oct;5(11):1-6.
- 577 [10] Ma J, Bai L, Wang MD. Transcription under torsion. *Science*. 2013 Jun 28;340(6140):1580-3.
- 578 [11] Ma J, Tan C, Gao X, Fulbright RM, Roberts JW, Wang MD. Transcription factor regulation of RNA  
579 polymerase's torque generation capacity. *Proceedings of the National Academy of Sciences*. 2019 Feb  
580 12;116(7):2583-8.
- 581 [12] Kouzine F, Gupta A, Baranello L, Wojtowicz D, Ben-Aissa K, Liu J, Przytycka TM, Levens D.  
582 Transcription-dependent dynamic supercoiling is a short-range genomic force. *Nature structural &  
583 molecular biology*. 2013 Mar;20(3):396-403.
- 584 [13] Kim S, Beltran B, Irnov I, Jacobs-Wagner C. Long-distance cooperative and antagonistic RNA  
585 polymerase dynamics via DNA supercoiling. *Cell*. 2019 Sep 19;179(1):106-19.
- 586 [14] Jeong KS, Ahn J, Khodursky AB. Spatial patterns of transcriptional activity in the chromosome of  
587 *Escherichia coli*. *Genome biology*. 2004 Oct;5(11):1-0.
- 588 [15] Sobetzko P. Transcription-coupled DNA supercoiling dictates the chromosomal arrangement of  
589 bacterial genes. *Nucleic acids research*. 2016 Feb 29;44(4):1514-24.
- 590 [16] Bryant JA, Sellars LE, Busby SJ, Lee DJ. Chromosome position effects on gene expression in  
591 *Escherichia coli* K-12. *Nucleic acids research*. 2014 Oct 13;42(18):11383-92.
- 592 [17] Scholz SA, Diao R, Wolfe MB, Fivenson EM, Lin XN, Freddolino PL. High-resolution mapping of the  
593 *Escherichia coli* chromosome reveals positions of high and low transcription. *Cell systems*. 2019 Mar  
594 27;8(3):212-25.

- 595 [18] Postow L, Hardy CD, Arsuaga J, Cozzarelli NR. Topological domain structure of the Escherichia coli  
596 chromosome. *Genes & development*. 2004 Jul 15;18(14):1766-79.
- 597 [19] Hardy CD, Cozzarelli NR. A genetic selection for supercoiling mutants of Escherichia coli reveals  
598 proteins implicated in chromosome structure. *Molecular microbiology*. 2005 Sep;57(6):1636-52.
- 599 [20] Sevier SA, Levine H. Properties of gene expression and chromatin structure with mechanically  
600 regulated elongation. *Nucleic acids research*. 2018 Jul 6;46(12):5924-34.
- 601 [21] Bohrer CH, Roberts E. A biophysical model of supercoiling dependent transcription predicts a structural  
602 aspect to gene regulation. *BMC biophysics*. 2015 Dec;9(1):1-3.
- 603 [22] Sevier SA, Levine H. Mechanical properties of transcription. *Physical review letters*. 2017 Jun  
604 27;118(26):268101.
- 605 [23] El Houdaigui B, Forquet R, Hindré T, Schneider D, Nasser W, Reverchon S, Meyer S. Bacterial  
606 genome architecture shapes global transcriptional regulation by DNA supercoiling. *Nucleic acids  
607 research*. 2019 Jun 20;47(11):5648-57.
- 608 [24] Ancona M, Bentivoglio A, Brackley CA, Gonnella G, Marenduzzo D. Transcriptional bursts in a  
609 nonequilibrium model for gene regulation by supercoiling. *Biophysical journal*. 2019 Jul 23;117(2):369-  
610 76.
- 611 [25] Klindziuk A, Kolomeisky AB. Long-Range Supercoiling-Mediated RNA Polymerase Cooperation in  
612 Transcription. *The Journal of Physical Chemistry B*. 2021 Apr 29;125(18):4692-700.
- 613 [26] Tripathi S, Brahmachari S, Onuchic JN, Levine H. Mechanical Interplay Between Transcription  
614 Elongation and DNA Supercoiling. *bioRxiv*. 2021 Jan 1.
- 615 [27] Chatterjee P, Goldenfeld N, Kim S. DNA Supercoiling Drives a Transition between Collective Modes  
616 of Gene Synthesis. *arXiv preprint arXiv:2103.10947*. 2021 Mar 19.
- 617 [28] Roberts E, Stone JE, Luthey-Schulten Z. Lattice microbes: High-performance stochastic simulation  
618 method for the reaction-diffusion master equation. *Journal of computational chemistry*. 2013 Jan  
619 30;34(3):245-55.
- 620 [29] Bates AD, Maxwell A. *DNA topology*. Oxford University Press, USA; 2005.

- 621 [30] Wang MD, Schnitzer MJ, Yin H, Landick R, Gelles J, Block SM. Force and velocity measured for  
622 single molecules of RNA polymerase. *Science*. 1998 Oct 30;282(5390):902-7.
- 623 [31] Marko JF, Siggia ED. Fluctuations and supercoiling of DNA. *Science*. 1994 Jul 22;265(5171):506-8.
- 624 [32] Neukirch S. Extracting DNA twist rigidity from experimental supercoiling data. *Physical review letters*.  
625 2004 Nov 5;93(19):198107.
- 626 [33] van Loenhout MT, De Grunt MV, Dekker C. Dynamics of DNA supercoils. *Science*. 2012 Oct  
627 5;338(6103):94-7.
- 628 [34] Bécavin C, Barbi M, Victor JM, Lesne A. Transcription within condensed chromatin: Steric hindrance  
629 facilitates elongation. *Biophysical journal*. 2010 Mar 3;98(5):824-33.
- 630 [35] Lesne A, Victor JM, Bertrand E, Basyuk E, Barbi M. The Role of Supercoiling in the Motor Activity of  
631 RNA Polymerases. *Molecular Motors*. 2018:215-32.
- 632 [36] Bauer WR. Structure and reactions of closed duplex DNA. *Annual review of biophysics and*  
633 *bioengineering*. 1978 Jun;7(1):287-313.
- 634 [37] Stracy M, Wollman AJ, Kaja E, Gapinski J, Lee JE, Leek VA, McKie SJ, Mitchenall LA, Maxwell A,  
635 Sherratt DJ, Leake MC. Single-molecule imaging of DNA gyrase activity in living *Escherichia coli*.  
636 *Nucleic acids research*. 2019 Jan 10;47(1):210-20.
- 637 [38] Ashley RE, Dittmore A, McPherson SA, Turnbough Jr CL, Neuman KC, Osheroff N. Activities of  
638 gyrase and topoisomerase IV on positively supercoiled DNA. *Nucleic acids research*. 2017 Sep  
639 19;45(16):9611-24.
- 640 [39] Yager TD, Von Hippel PH. A thermodynamic analysis of RNA transcript elongation and termination in  
641 *Escherichia coli*. *Biochemistry*. 1991 Jan 1;30(4):1097-118.
- 642 [40] Drolet M, Broccoli S, Rallu F, Hraiky C, Fortin C, Massé É, Baaklini I. The problem of hypernegative  
643 supercoiling and R-loop formation in transcription. *Front Biosci*. 2003 Jan 1;8(4):d210-21.
- 644 [41] Niehrs C, Luke B. Regulatory R-loops as facilitators of gene expression and genome stability. *Nature*  
645 *Reviews Molecular Cell Biology*. 2020 Mar;21(3):167-78.

- 646 [42] Liang ST, Bipatnath M, Xu YC, Chen SL, Dennis P, Ehrenberg M, Bremer H. Activities of constitutive  
647 promoters in Escherichia coli. *Journal of molecular biology*. 1999 Sep 10;292(1):19-37.
- 648 [43] Golding I, Paulsson J, Zawilski SM, Cox EC. Real-time kinetics of gene activity in individual bacteria.  
649 *Cell*. 2005 Dec 16;123(6):1025-36.
- 650 [44] Taniguchi Y, Choi PJ, Li GW, Chen H, Babu M, Hearn J, Emili A, Xie XS. Quantifying E. coli  
651 proteome and transcriptome with single-molecule sensitivity in single cells. *science*. 2010 Jul  
652 30;329(5991):533-8.
- 653 [45] So LH, Ghosh A, Zong C, Sepúlveda LA, Segev R, Golding I. General properties of transcriptional time  
654 series in Escherichia coli. *Nature genetics*. 2011 Jun;43(6):554-60.
- 655 [46] Jones DL, Brewster RC, Phillips R. Promoter architecture dictates cell-to-cell variability in gene  
656 expression. *Science*. 2014 Dec 19;346(6216):1533-6.
- 657 [47] Kussell E, Leibler S. Phenotypic diversity, population growth, and information in fluctuating  
658 environments. *Science*. 2005 Sep 23;309(5743):2075-8.
- 659 [48] Swain PS, Elowitz MB, Siggia ED. Intrinsic and extrinsic contributions to stochasticity in gene  
660 expression. *Proceedings of the National Academy of Sciences*. 2002 Oct 1;99(20):12795-800.
- 661 [49] Sanchez A, Golding I. Genetic determinants and cellular constraints in noisy gene expression. *Science*.  
662 2013 Dec 6;342(6163):1188-93.
- 663 [50] Snyder M, Drlica K. DNA gyrase on the bacterial chromosome: DNA cleavage induced by oxolinic  
664 acid. *Journal of molecular biology*. 1979 Jun 25;131(2):287-302.
- 665 [51] Moulin L, Rahmouni AR, Boccard F. Topological insulators inhibit diffusion of transcription-induced  
666 positive supercoils in the chromosome of Escherichia coli. *Molecular microbiology*. 2005  
667 Jan;55(2):601-10.
- 668 [52] Zurla C, Manzo C, Dunlap D, Lewis DE, Adhya S, Finzi L. Direct demonstration and quantification of  
669 long-range DNA looping by the  $\lambda$  bacteriophage repressor. *Nucleic acids research*. 2009 May  
670 1;37(9):2789-95.

- 671 [53] Hensel Z, Weng X, Lagda AC, Xiao J. Transcription-factor-mediated DNA looping probed by high-  
672 resolution, single-molecule imaging in live E. coli cells. *PLoS biology*. 2013 Jun 18;11(6):e1001591.
- 673 [54] Fulcrand G, Dages S, Zhi X, Chapagain P, Gerstman BS, Dunlap D, Leng F. DNA supercoiling, a  
674 critical signal regulating the basal expression of the lac operon in Escherichia coli. *Scientific reports*.  
675 2016 Jan 14;6(1):1-2.
- 676 [55] Verma SC, Qian Z, Adhya SL. Architecture of the Escherichia coli nucleoid. *PLoS genetics*. 2019 Dec  
677 12;15(12):e1008456.
- 678 [56] Yeung E, Dy AJ, Martin KB, Ng AH, Del Vecchio D, Beck JL, Collins JJ, Murray RM. Biophysical  
679 constraints arising from compositional context in synthetic gene networks. *Cell systems*. 2017 Jul  
680 26;5(1):11-24.
